# Supplementary material
Source: publisher site journal article supplement (https://www.dovepress.com/get_supplementary_file.php?f=375180.docx)
Supplement: Supplementary file 1 [file get_supplementary_file.php]

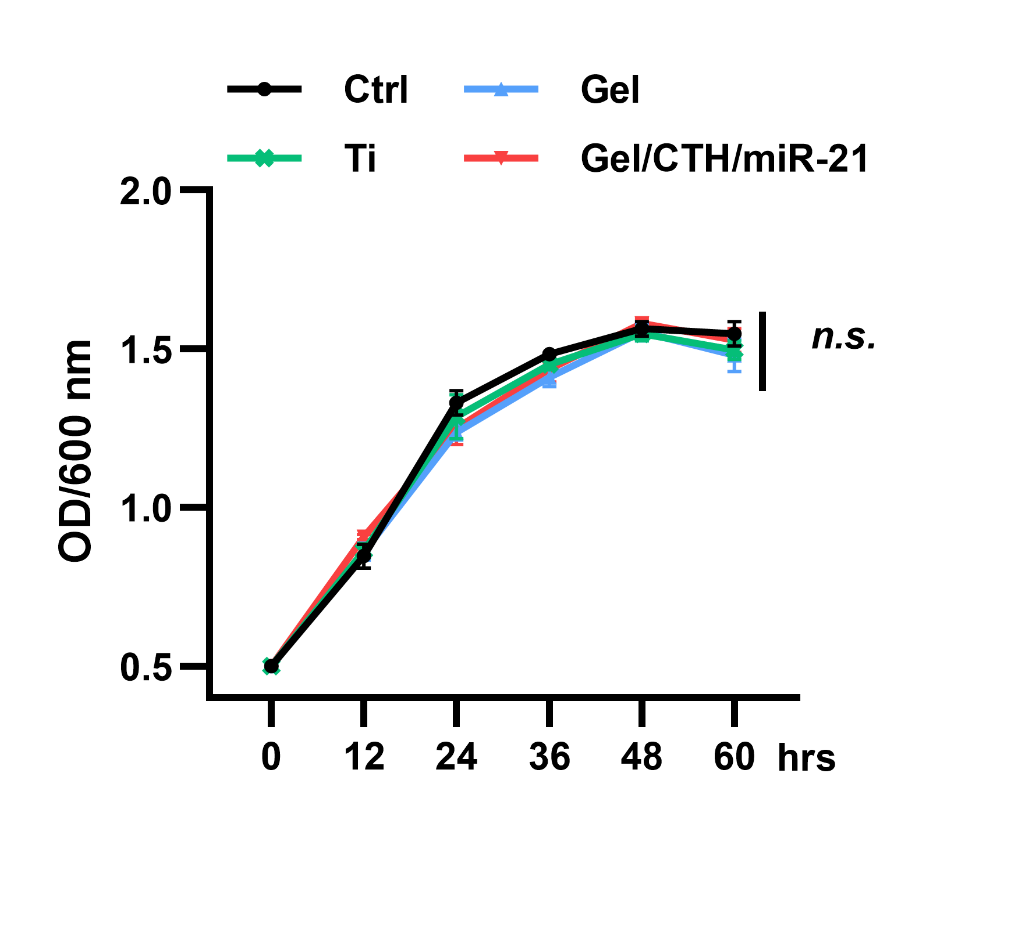


**Figure S1 Growth curves of Porphyromonas gingivalis on unmodified and coated Ti surface.** Data are given as the mean ± SD, n = 3. Ctrl: polystyrene culture plate; Ti: unmodified smooth Ti substrates; Gel: gel-coated Ti substrates; Gel/ CTH/miR-21: CTH/miR-21 NP-coated Ti substrates at a concentration of 300 pmol/specimen miR-21.
